# Supplementary material
Source: publisher figshare collection journal article supplement (https://acs.figshare.com/ndownloader/files/7313267)

## Supporting Information

### Discovery of a highly potent, selective, and metabolically stable inhibitor of receptor-interacting protein 1 (RIP1) for the treatment of systemic inflammatory response syndrome

*Yan Ren, Yaning Su, Liming Sun, Sudan He, Lingjun Meng, Daohong Liao, Xiao Liu, Yongfen Ma, Chunyan Liu, Sisi Li, Hanying Ruan, Xiaoguang Lei, Xiaodong Wang\* and Zhiyuan Zhang\**

#### Table of Contents

| Contents                                       | Page   |
|------------------------------------------------|--------|
| Supporting Figures and Tables                  | S2-S5  |
| <sup>1</sup> H and <sup>13</sup> C NMR spectra | S6-S24 |

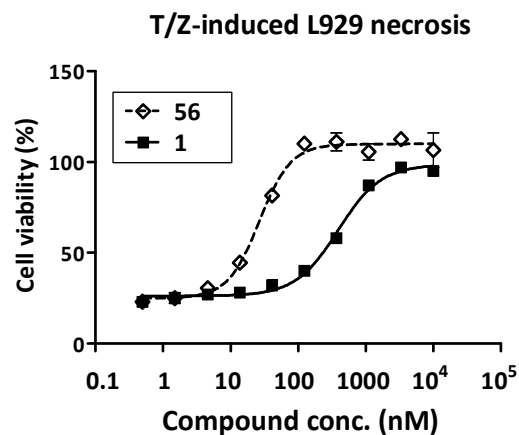

**Figure s1.** Compound **56** shows efficient protection to TZ-induced murine L929 cells necrosis (Compd **56**  $EC_{50}$  = 27 nM, **1**  $EC_{50}$  = 391 nM).

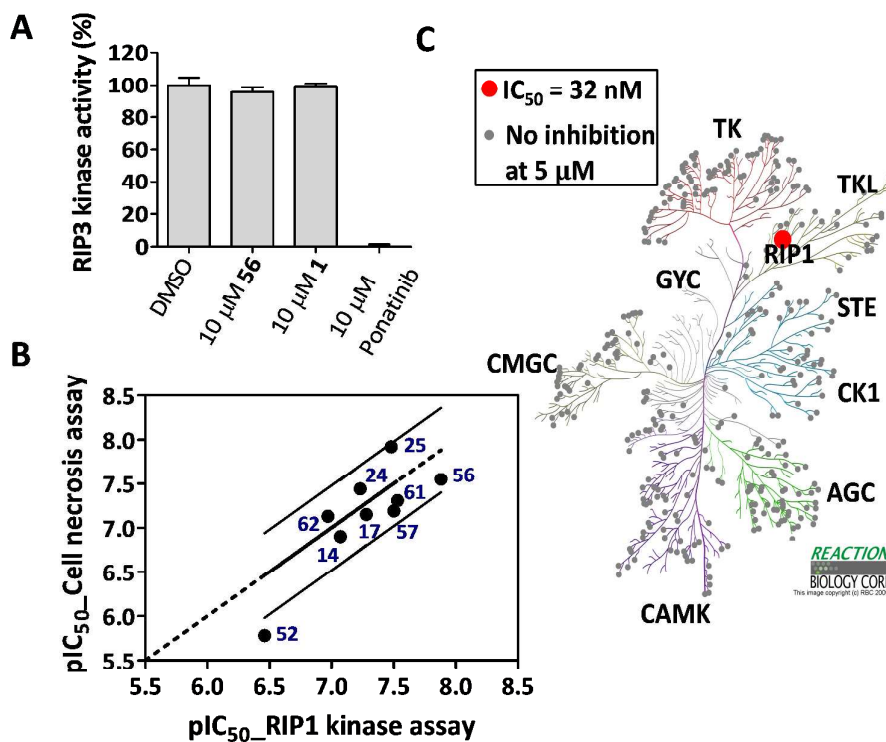

**Figure s2.** A, 10  $\mu$ M Compound **56** and **1** showed no inhibition to RIP3 kinase activity, while ponatinib can efficiently inhibit RIP3 activity as reported. B, Inhibition of the new series compounds to RIP1 kinase activity and TSZ-induced HT-29 cell necrosis shows a strong positive correlation ( $pIC_{50} = -\log IC_{50}$ , M;  $pEC_{50} = -\log EC_{50}$ , M). C, Compound **57** also shows excellent selectivity to RIP1 kinase according to the kinome panel screening results (conducted by Reaction Biology Corp.)

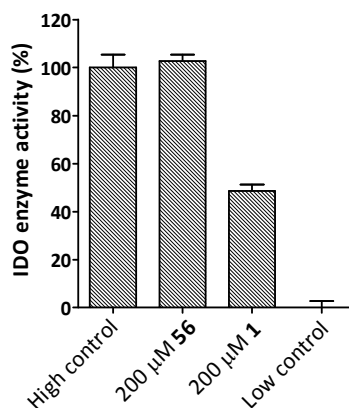

**Figure s3.** Compound **56** shows no inhibition to IDO enzyme activity at 200 μM, while **1** inhibits 50% IDO activity at 200 μM.

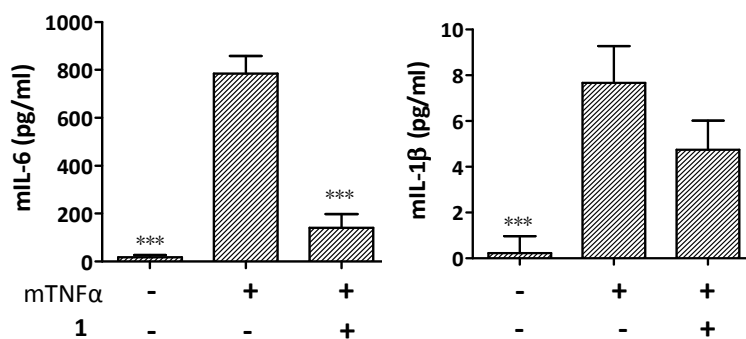

**Figure s4.** Single dose of 6 mg/kg BW **1** (IV) could partially inhibit mTNFα-induced increase of pro-inflammatory cytokines like mIL-6 and mIL-1β in C57BL mice. \*\*\* P < 0.001, each compared with TNFα model group.

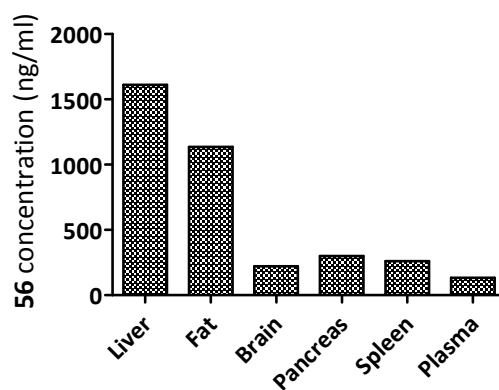

**Figure s5.** Tissue distribution of **56**. 20 mg/kg **56** was intravenously injected to C57BL/6 mice. The organs were separated two hours later and subjected to concentration determination.

**Table s1.** Summary of liver microsome stability data of the selected compounds

| Compd     | Human Liver Microsome |                                                         | Mouse Liver Microsome |                                                         |
|-----------|-----------------------|---------------------------------------------------------|-----------------------|---------------------------------------------------------|
|           | $t_{1/2}$ (min)       | Clint<br>( $\mu\text{l}/\text{min}/\text{mg protein}$ ) | $t_{1/2}$ (min)       | Clint<br>( $\mu\text{l}/\text{min}/\text{mg protein}$ ) |
| <b>9</b>  | 630                   | 1.10                                                    | 248                   | 2.80                                                    |
| <b>13</b> | 10.5                  | 65.9                                                    | 10.5                  | 65.9                                                    |
| <b>14</b> | 4.93                  | 141                                                     | 0.753                 | 921                                                     |
| <b>25</b> | 2.25                  | 308                                                     | 0.753                 | 921                                                     |
| <b>30</b> | 6.08                  | 114                                                     | 0.829                 | 114                                                     |
| <b>32</b> | 4.54                  | 153                                                     | 0.632                 | 1097                                                    |
| <b>34</b> | 9.17                  | 75.6                                                    | 2.41                  | 288                                                     |
| <b>37</b> | 4.34                  | 160                                                     | 11.9                  | 58.2                                                    |
| <b>42</b> | 2.17                  | 319                                                     | 0.753                 | 921                                                     |
| <b>43</b> | 0.753                 | 921                                                     | 0.753                 | 921                                                     |
| <b>44</b> | 0.897                 | 773                                                     | 0.753                 | 921                                                     |
| <b>49</b> | 210                   | 3.3                                                     | 7.02                  | 98.7                                                    |
| <b>51</b> | > 300                 | 0.06                                                    | 133                   | 5.2                                                     |

**Table s2.** Pharmacokinetic parameters of **56** in C57BL/6 mice.

| Route                        | IV   | IP    | PO   |
|------------------------------|------|-------|------|
| Dose (mg/kg)                 | 2    | 10    | 10   |
| C <sub>0</sub> (ng/ml)       | 1483 |       |      |
| C <sub>max</sub> (ng/ml)     |      | 3499  | 249  |
| T <sub>max</sub> (min)       |      | 4.98  | 30   |
| AUC <sub>tot</sub> (ng·h/ml) | 323  | 2189  | 349  |
| t <sub>1/2</sub> (h)         | 3.1  | 2.022 | 1.61 |
| CL <sub>p</sub> (ml/min/kg)  | 103  |       |      |
| V <sub>ss</sub> (l/kg)       | 27.8 |       |      |
| F (%)                        |      |       | 22   |

**Table s3.** Permeability of reference compounds and **56** in MDCK-MDR1 cells (Assayed by ChemPartner Co., Ltd., Shanghai, China).

| Test Article |     | P <sub>app</sub> ×10 <sup>6</sup> cm/sec |             |              | RSD  | Efflux Ratio |
|--------------|-----|------------------------------------------|-------------|--------------|------|--------------|
|              |     | Sample - 01                              | Sample - 02 | Mean         |      |              |
| Metoprolol   | A-B | 24.17                                    | 24.24       | <b>24.21</b> | 0.00 | <b>1.09</b>  |
|              | B-A | 25.88                                    | 27.13       | <b>26.51</b> | 0.03 |              |
| Atenolol     | A-B | 0.29                                     | 0.22        | <b>0.25</b>  | 0.20 | <b>1.80</b>  |
|              | B-A | 0.47                                     | 0.44        | <b>0.46</b>  | 0.04 |              |
| Quinidine    | A-B | 5.15                                     | 5.09        | <b>5.12</b>  | 0.01 | <b>7.18</b>  |
|              | B-A | 37.12                                    | 36.42       | <b>36.77</b> | 0.01 |              |
| <b>56</b>    | A-B | 35.28                                    | 38.11       | <b>36.70</b> | 0.05 | <b>0.87</b>  |
|              | B-A | 32.44                                    | 31.62       | <b>32.03</b> | 0.02 |              |

# <sup>1</sup>H and <sup>13</sup>C NMR spectra

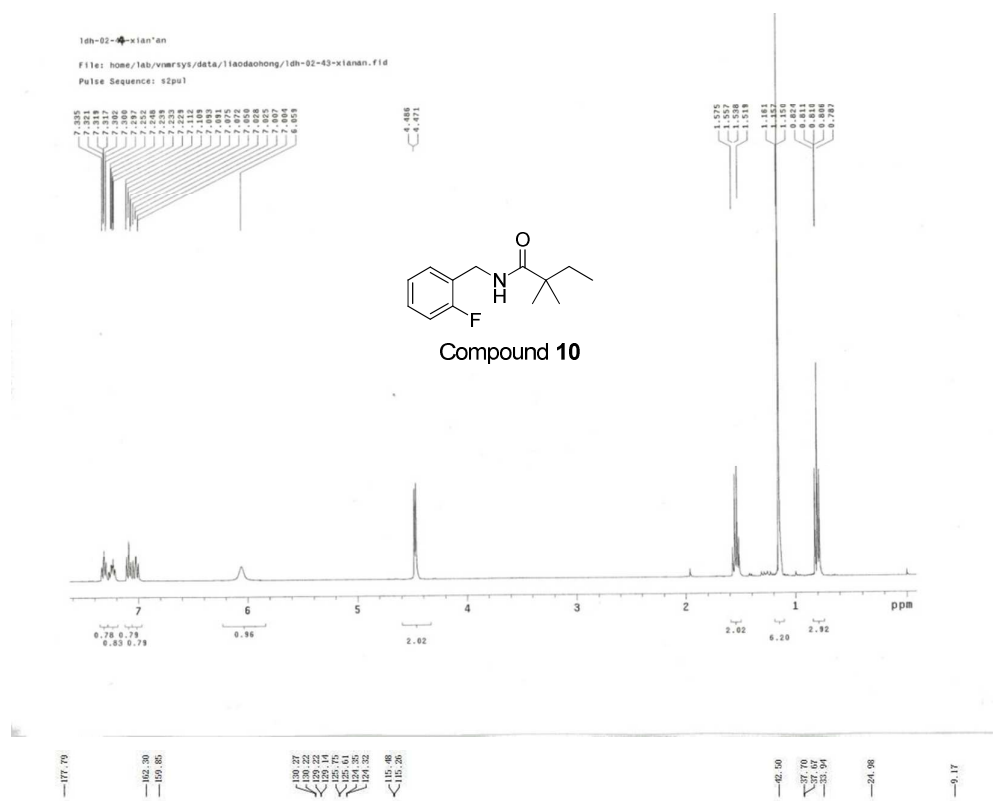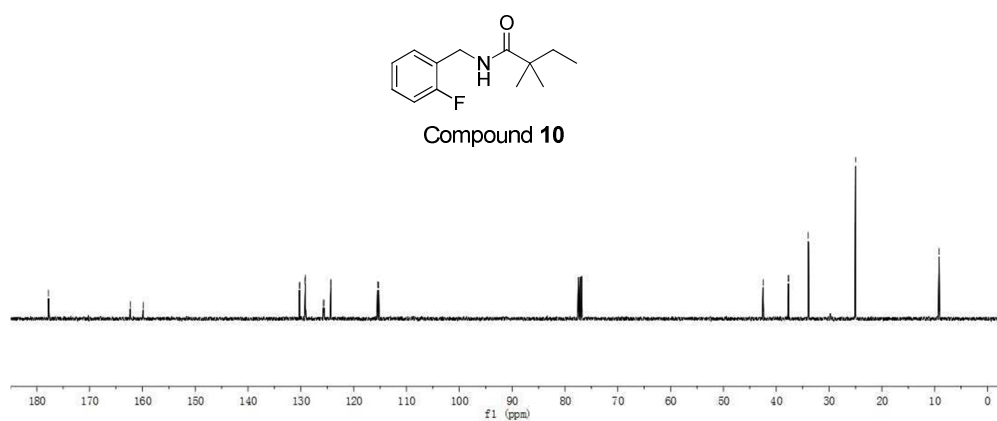

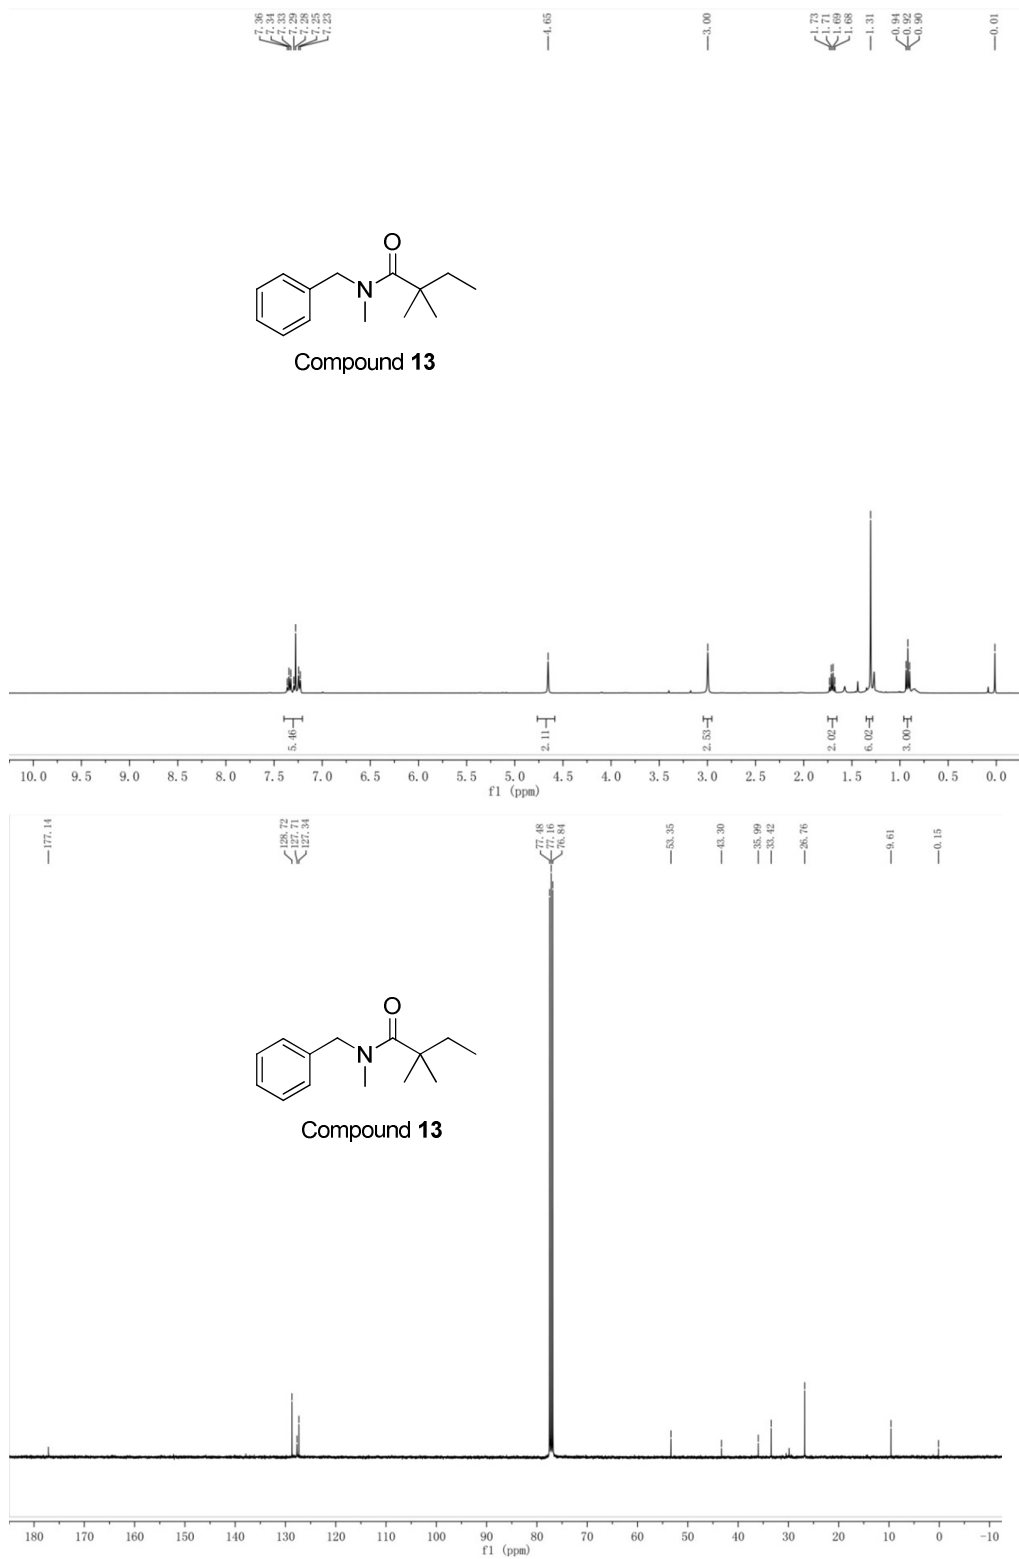



```
File: home/lab/vnmr/sys/data/lab backup NMR data/data/qy/qy-01-40.fid
Pulse Sequence: s2pul1
```

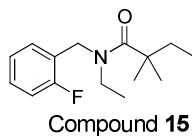

### Compound 15

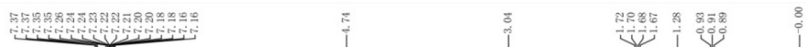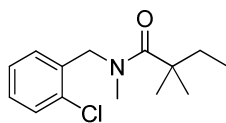

Compound **16**

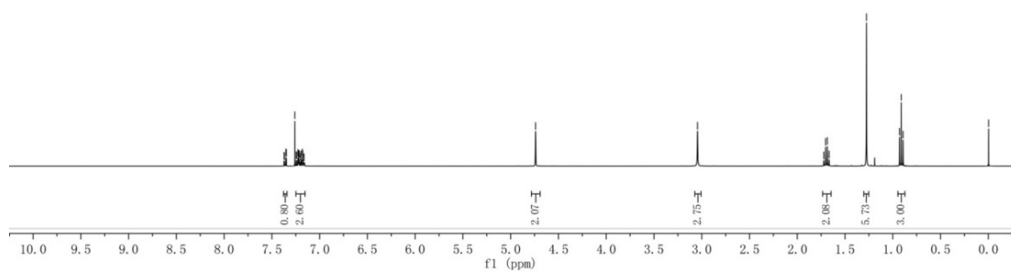

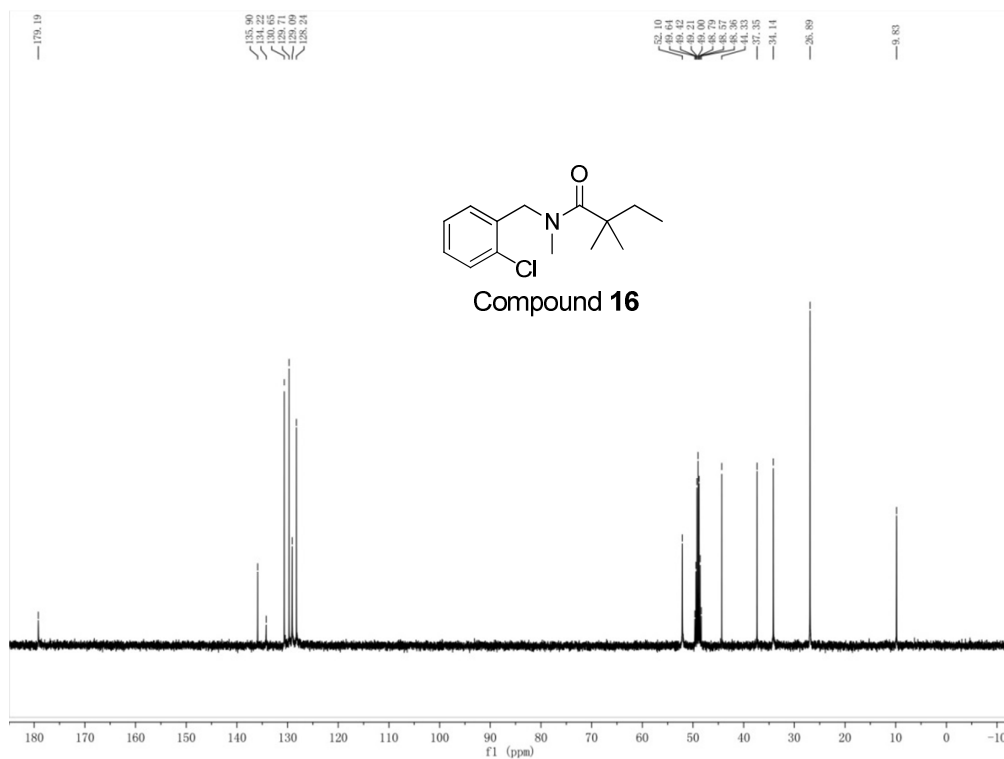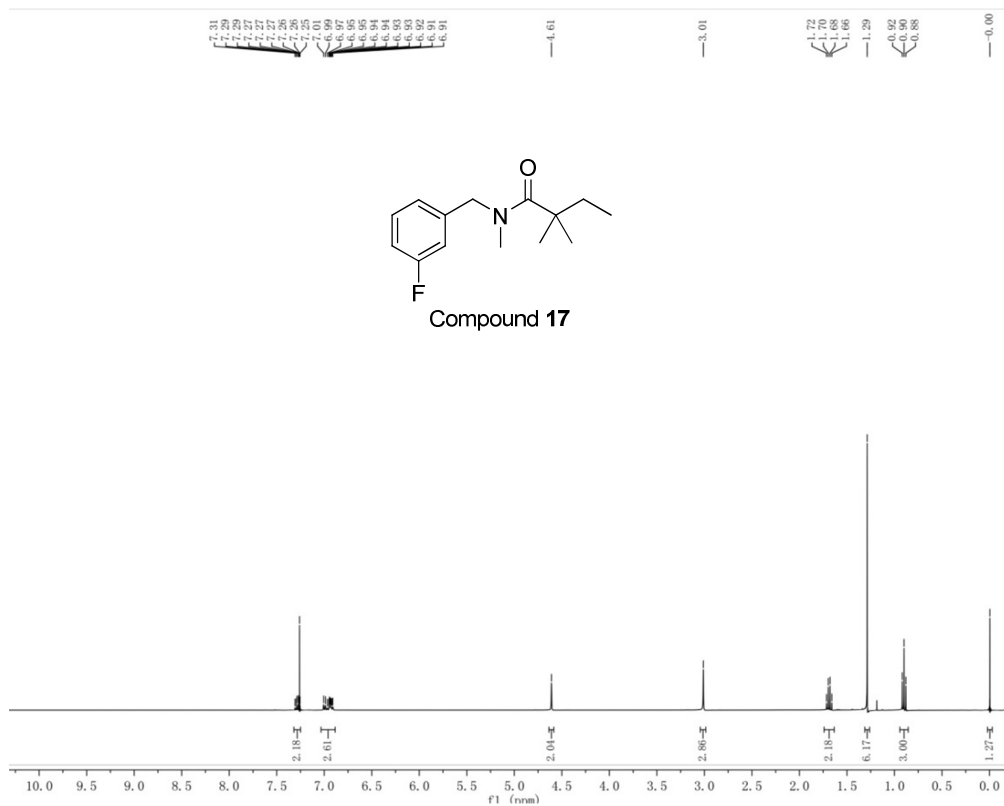

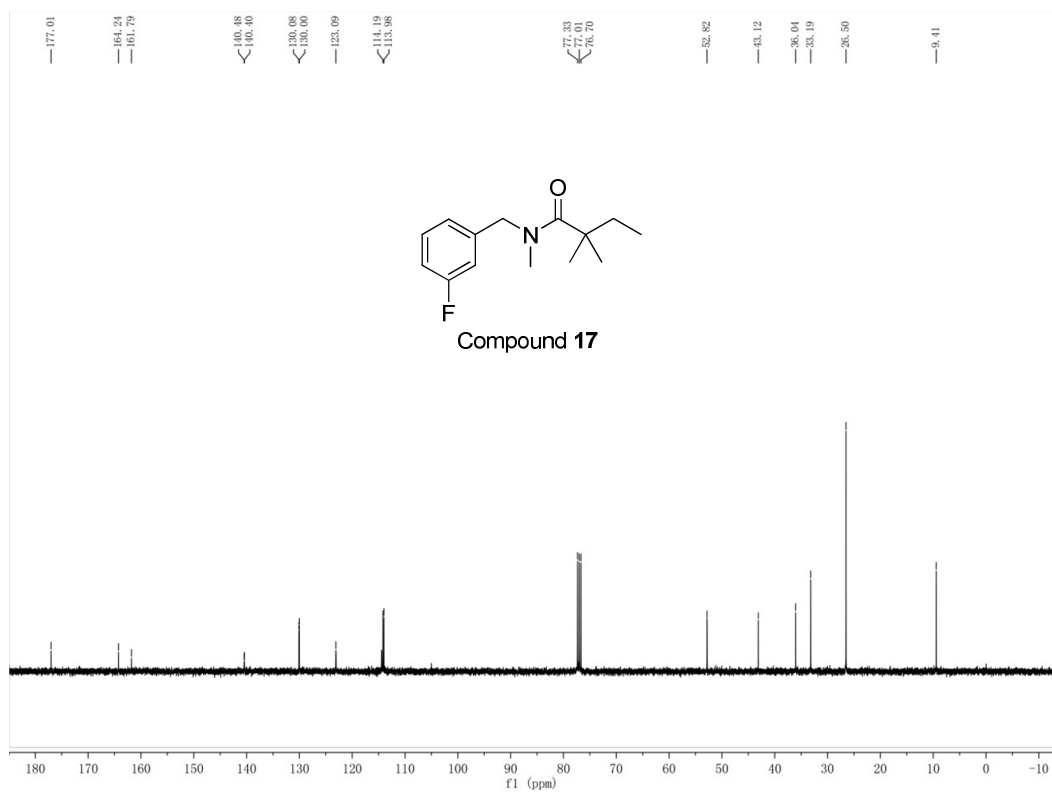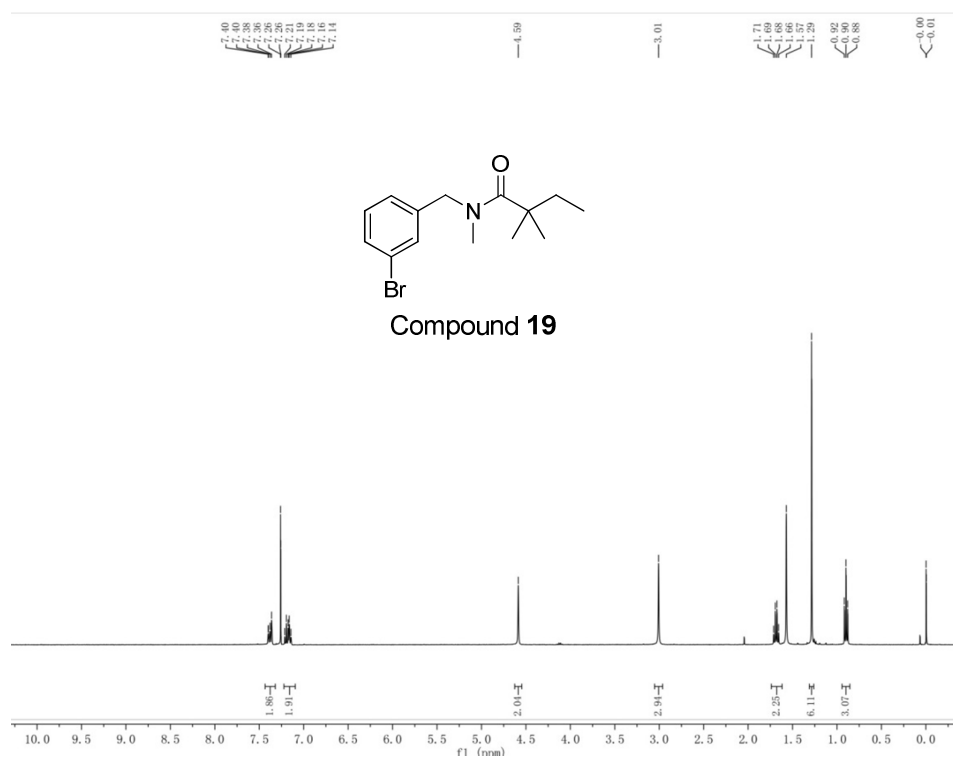

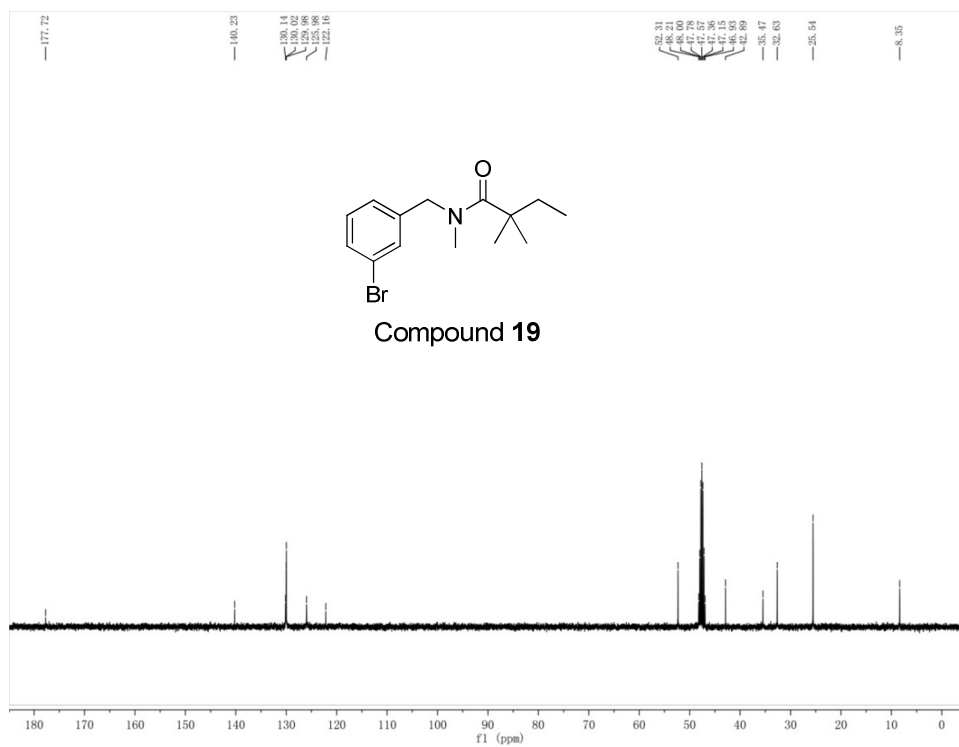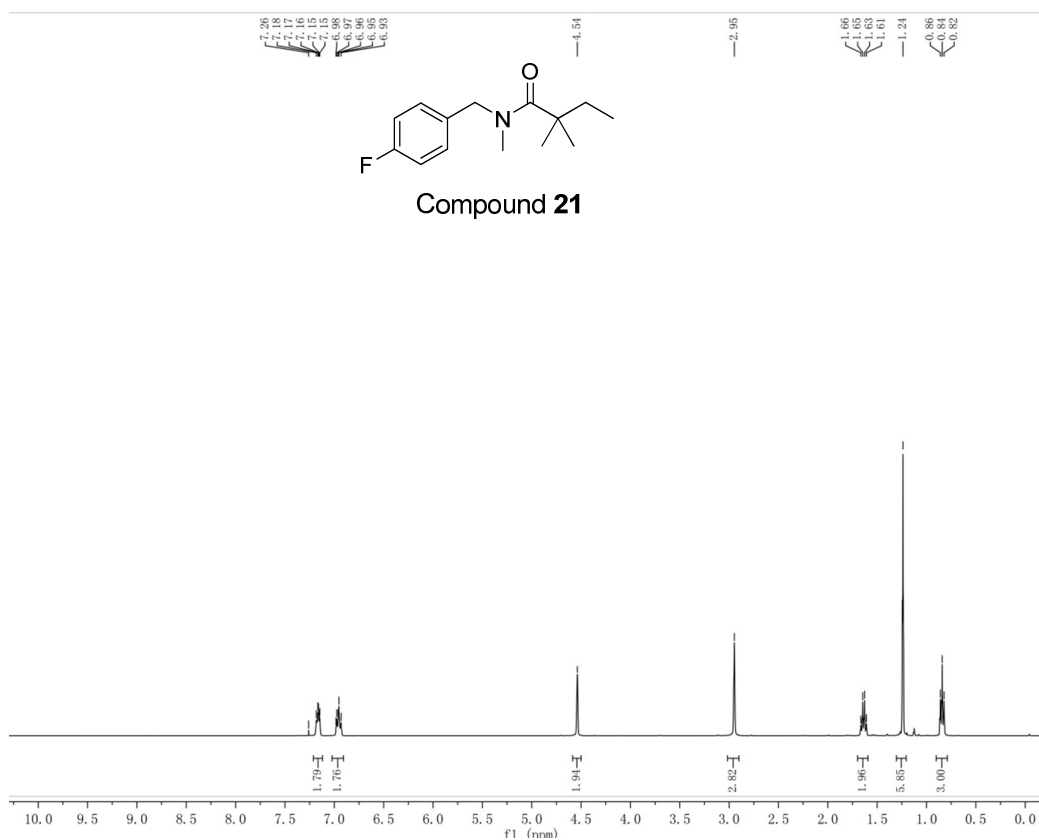

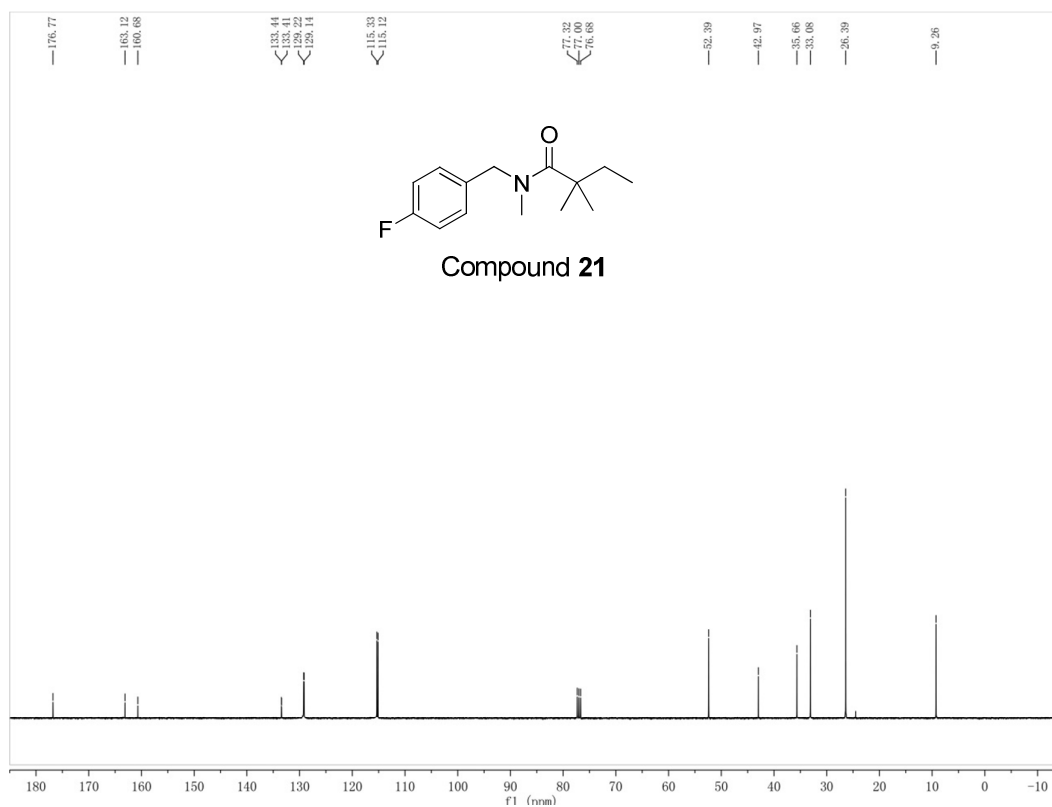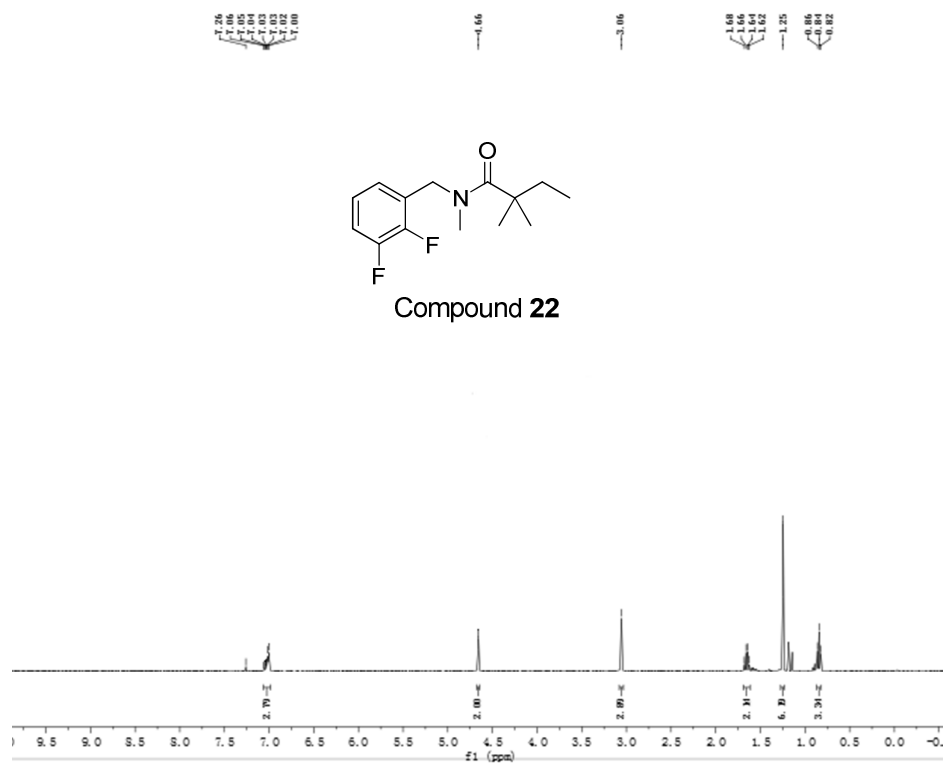

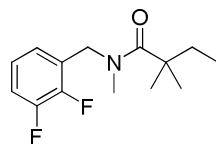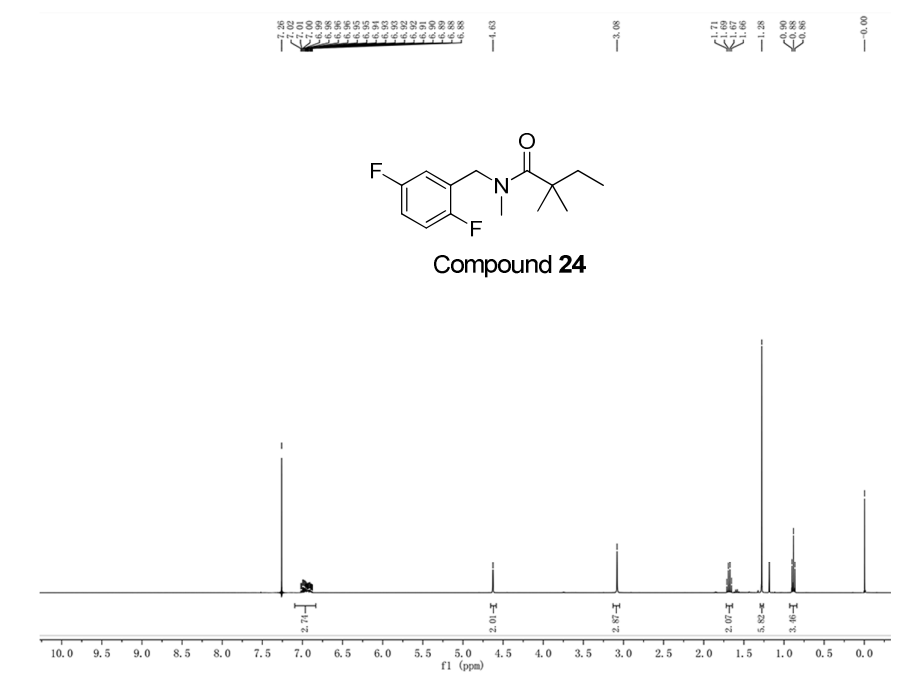

### Compound 24

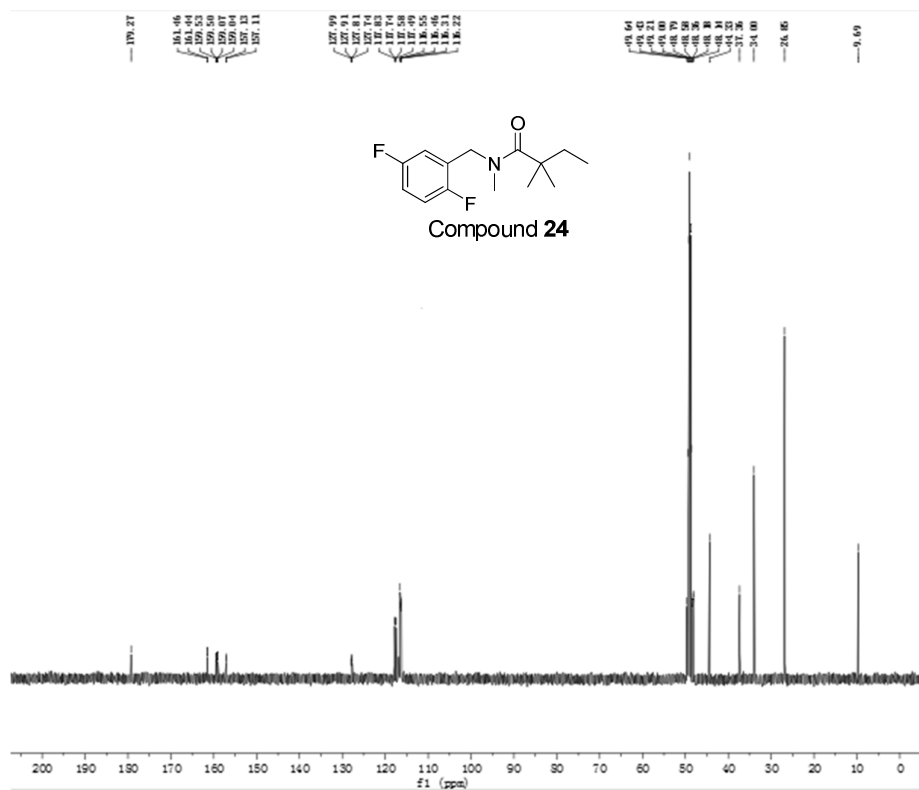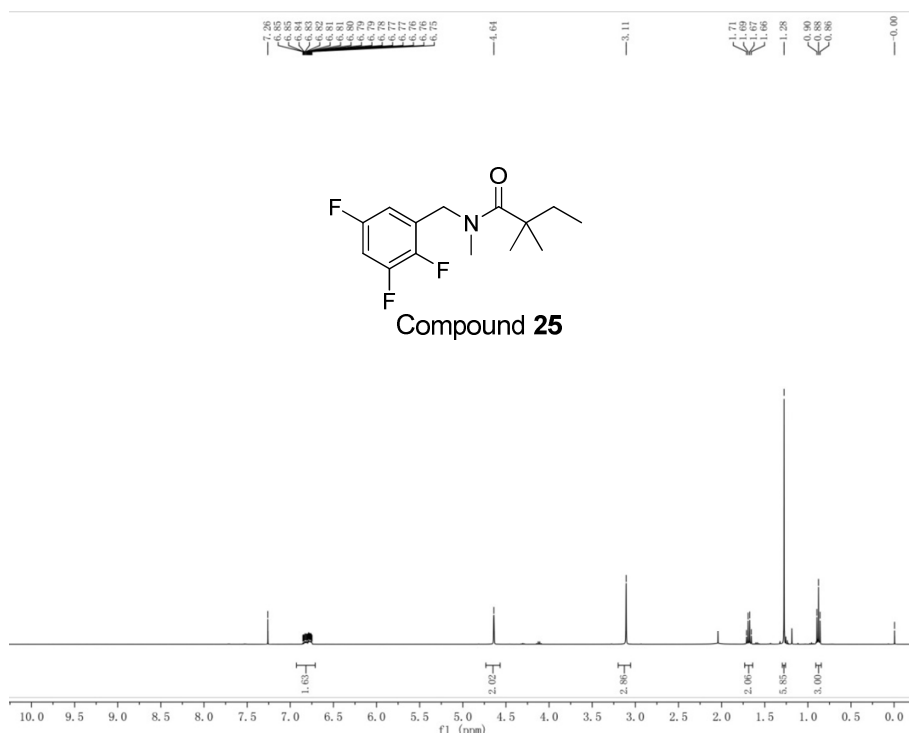

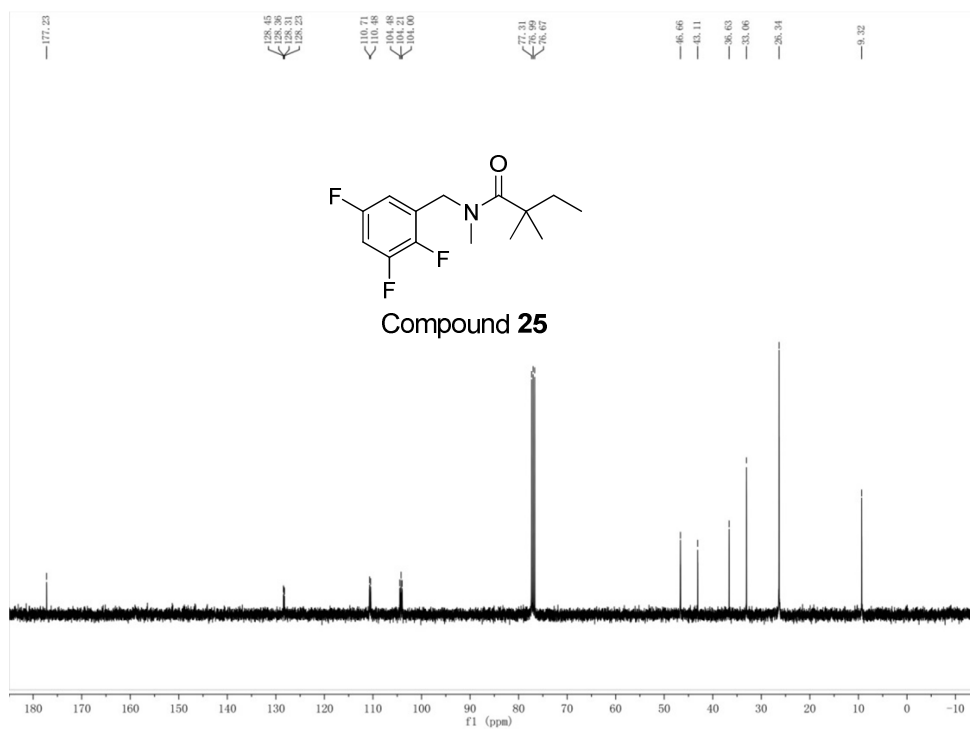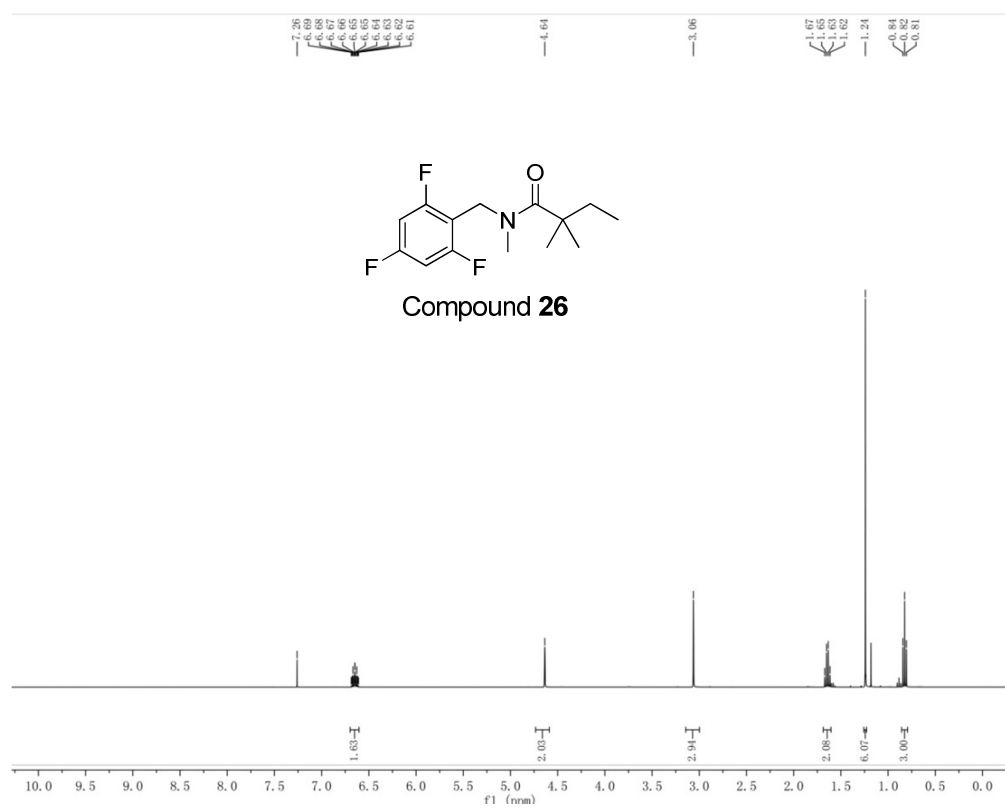

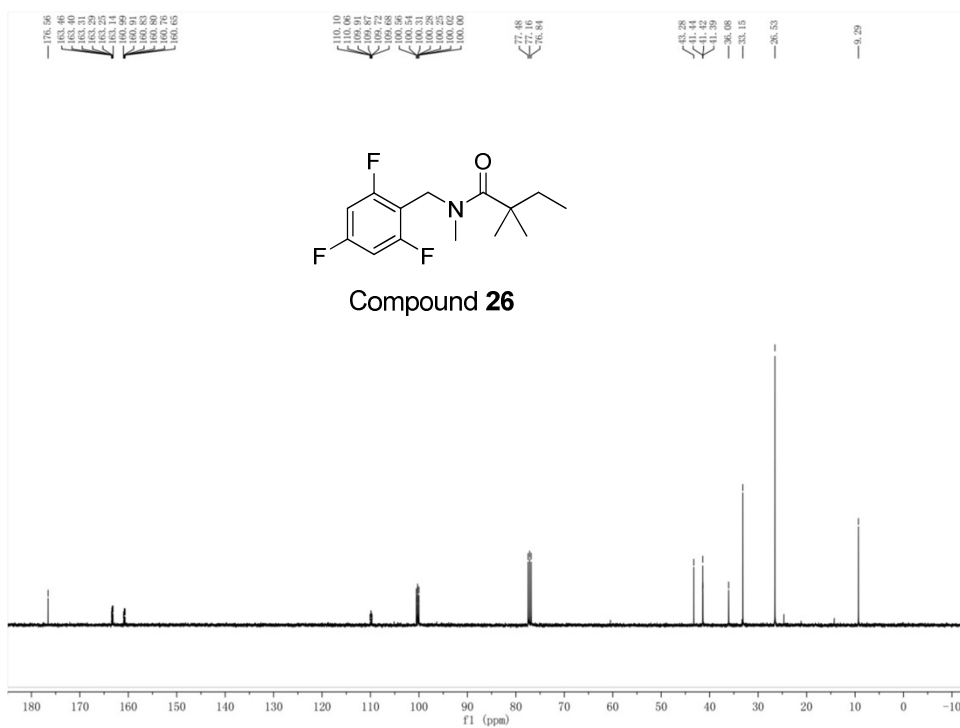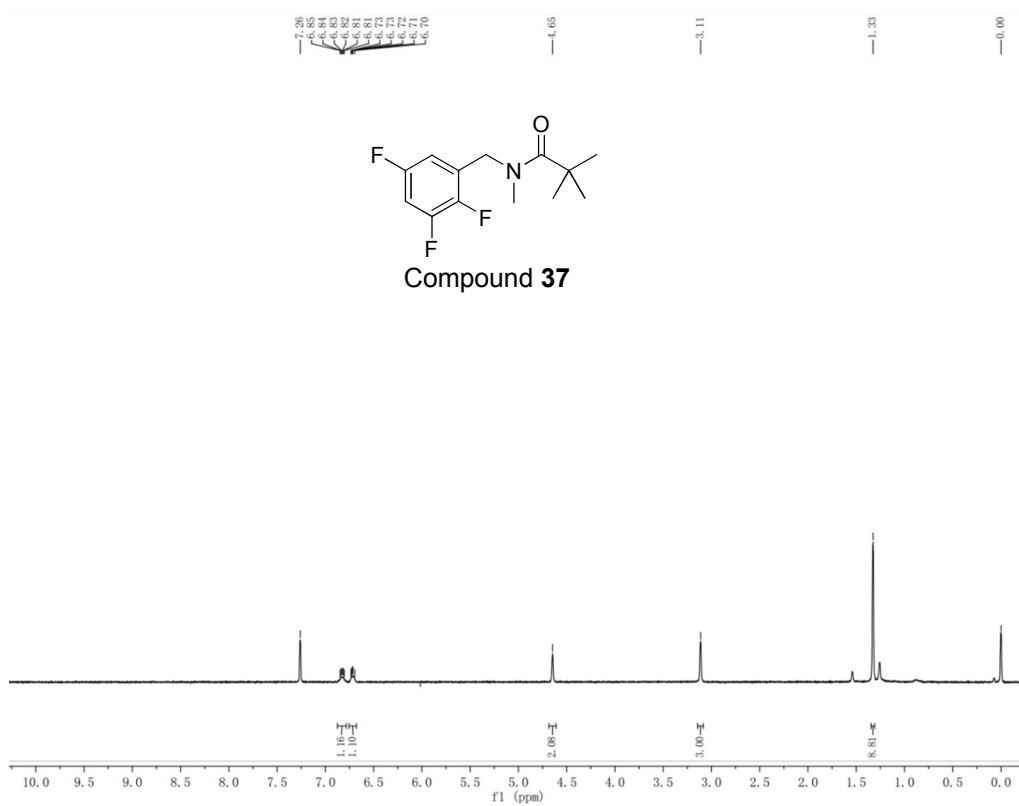

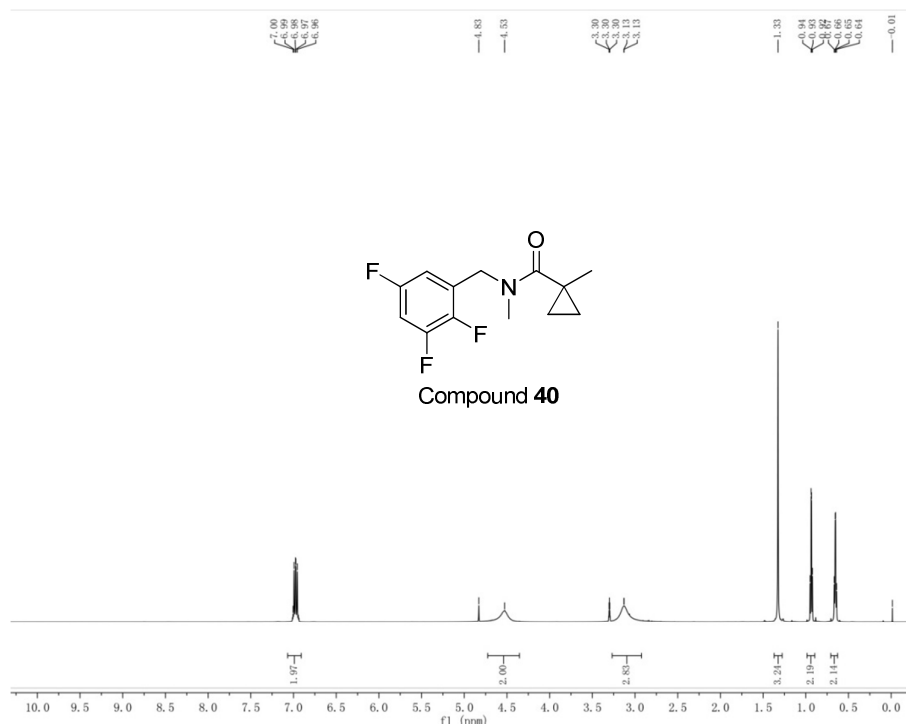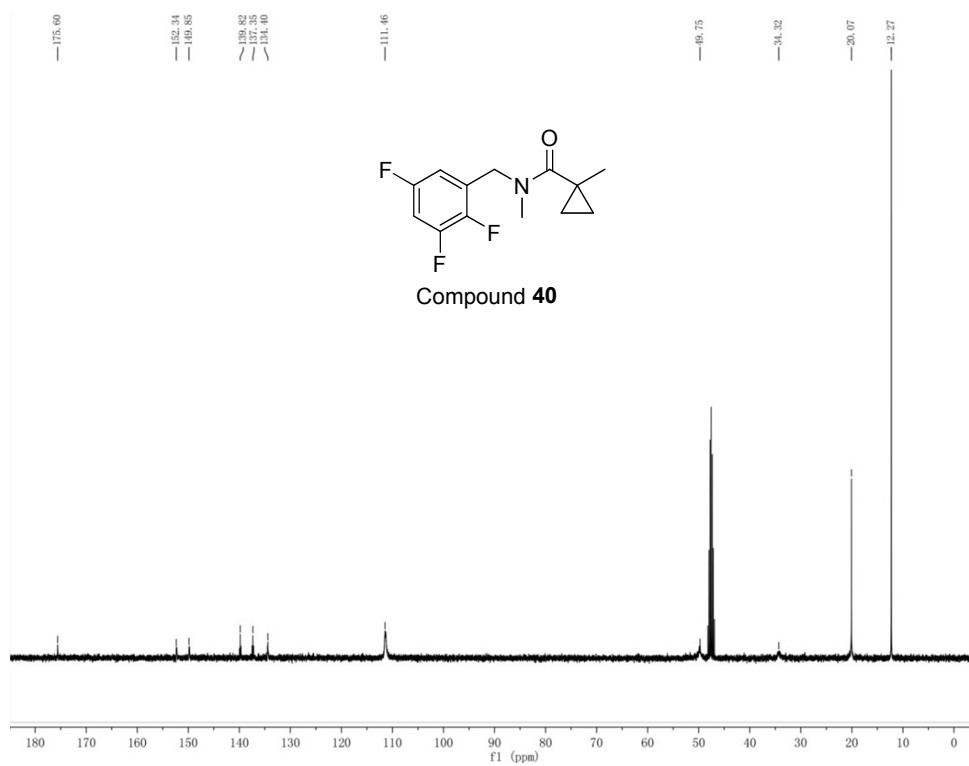

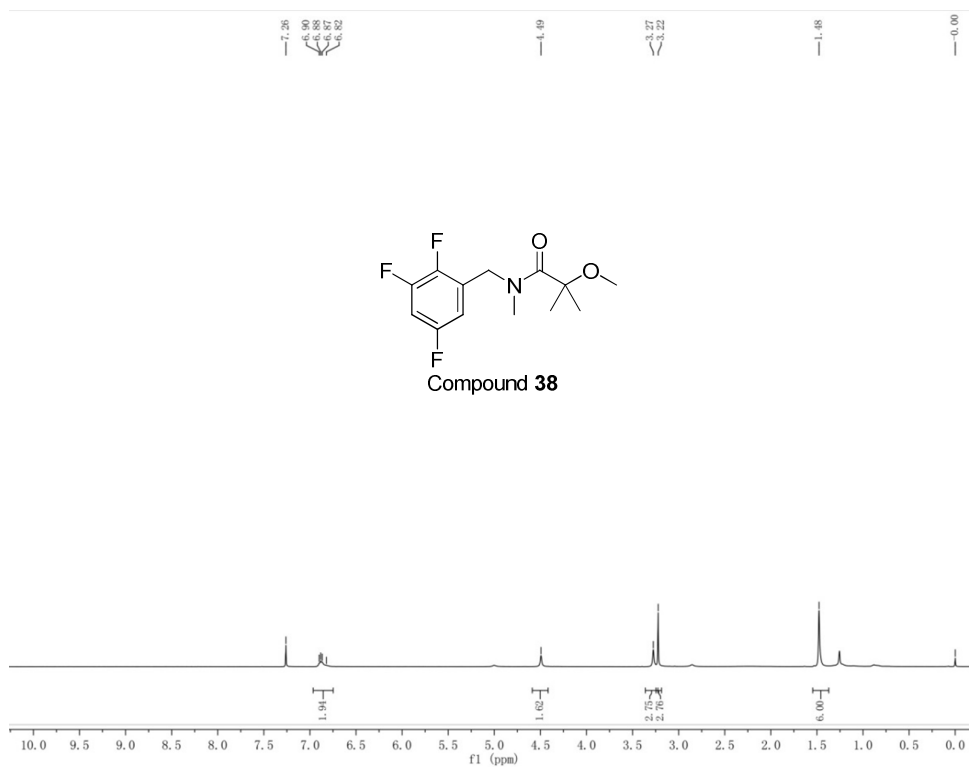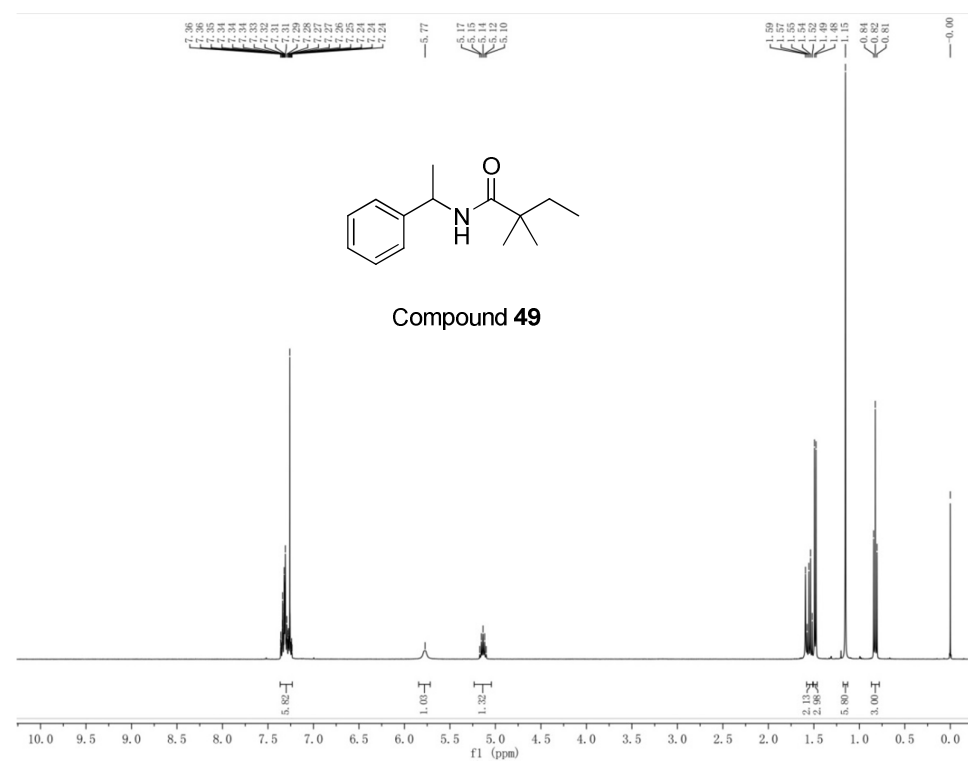

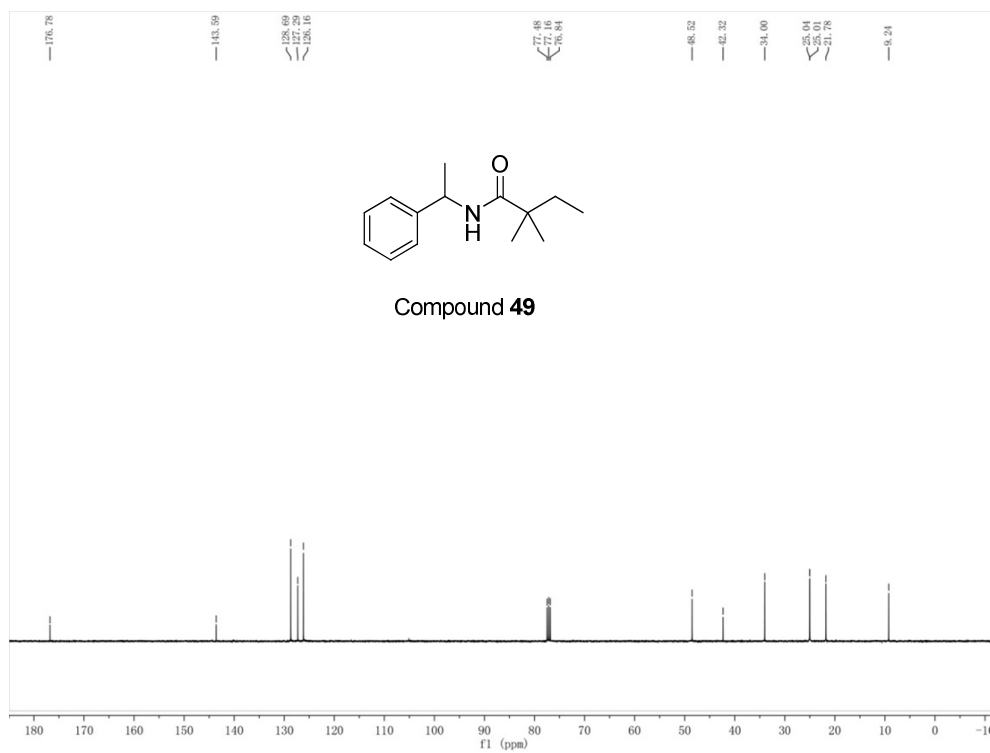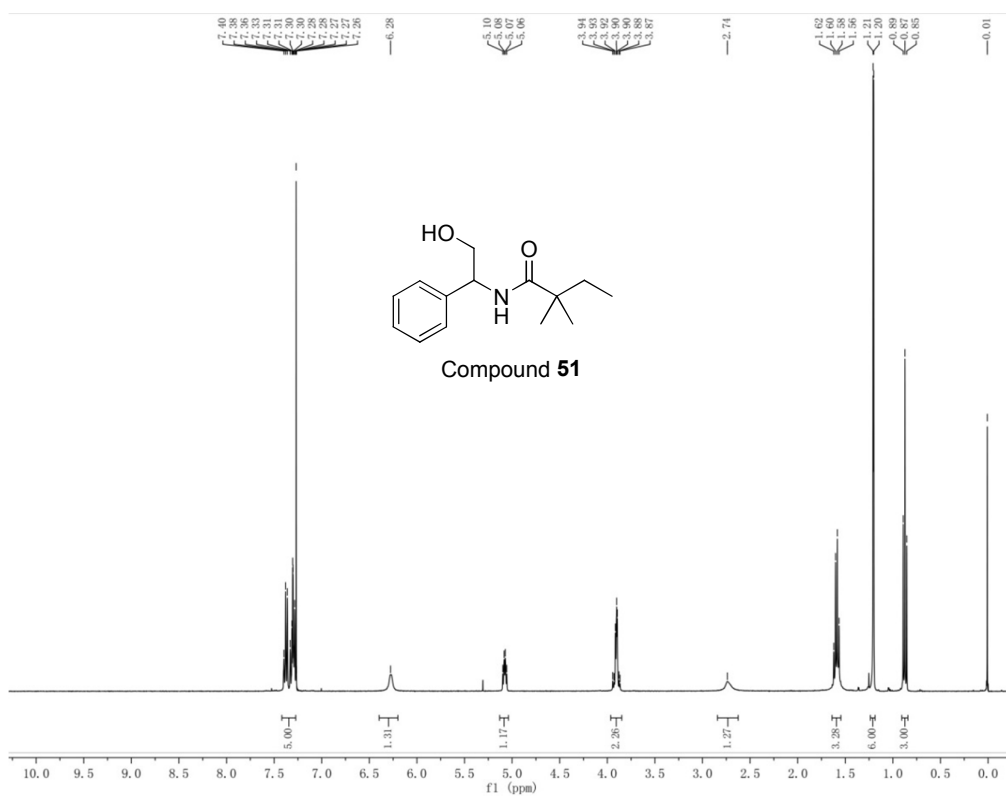

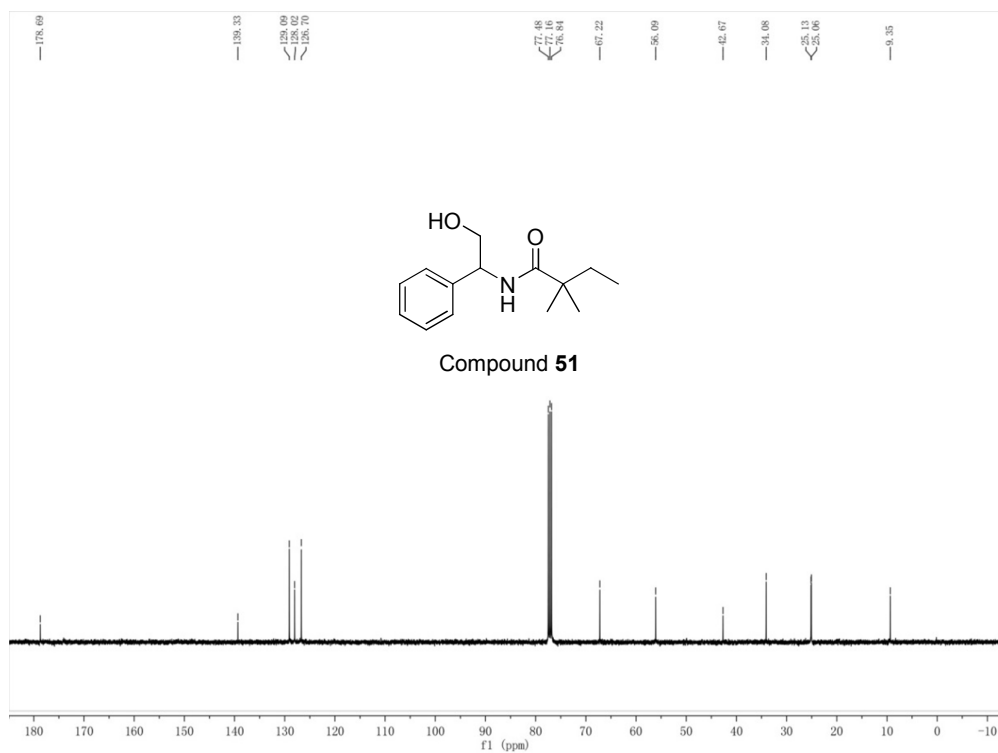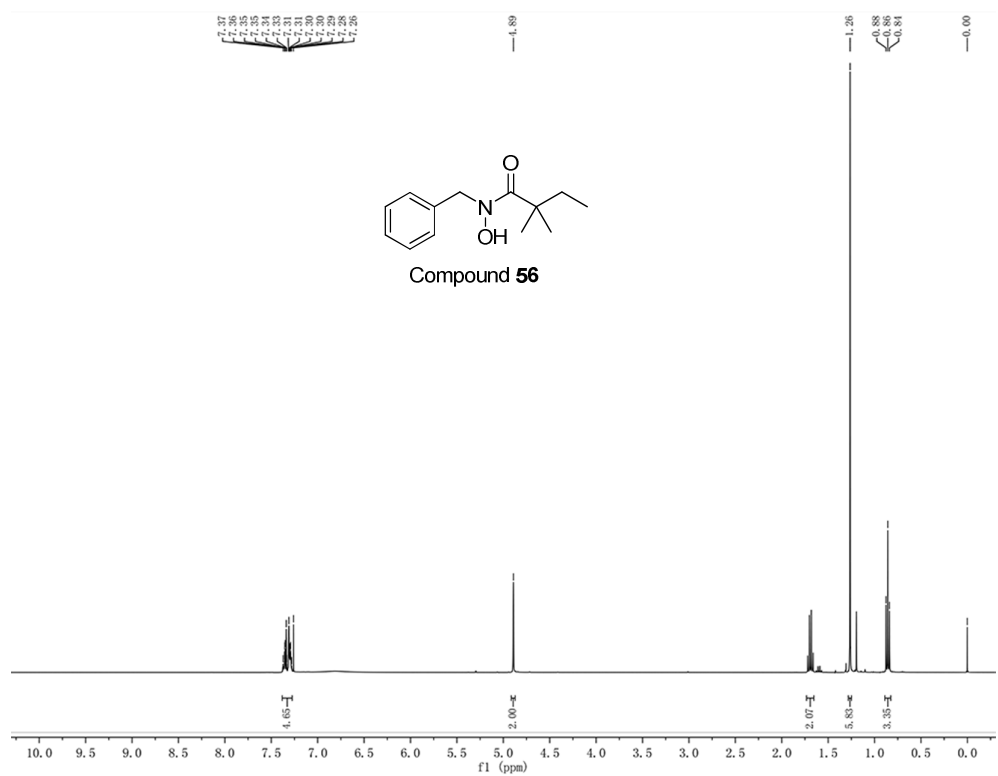

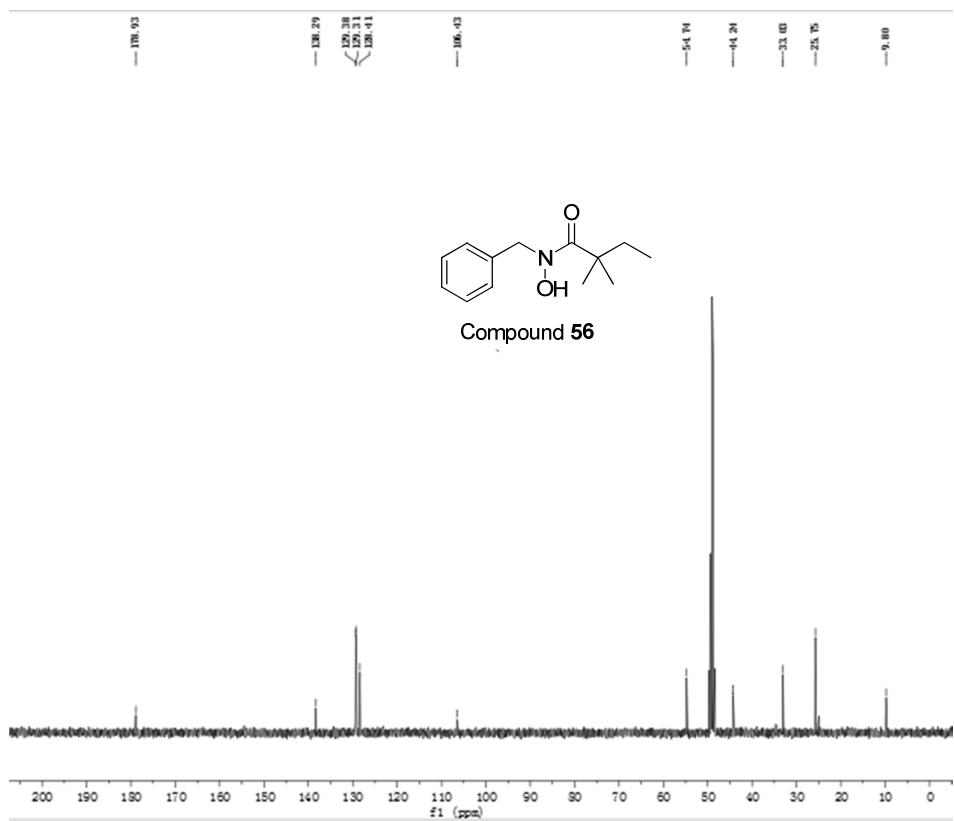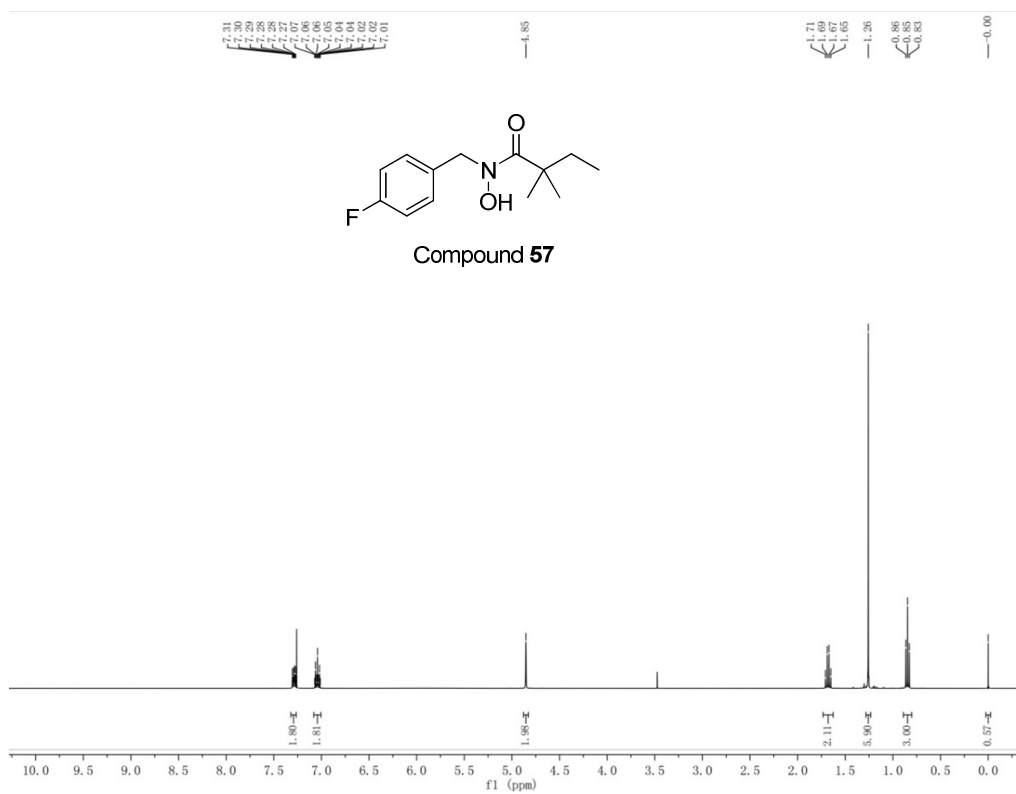

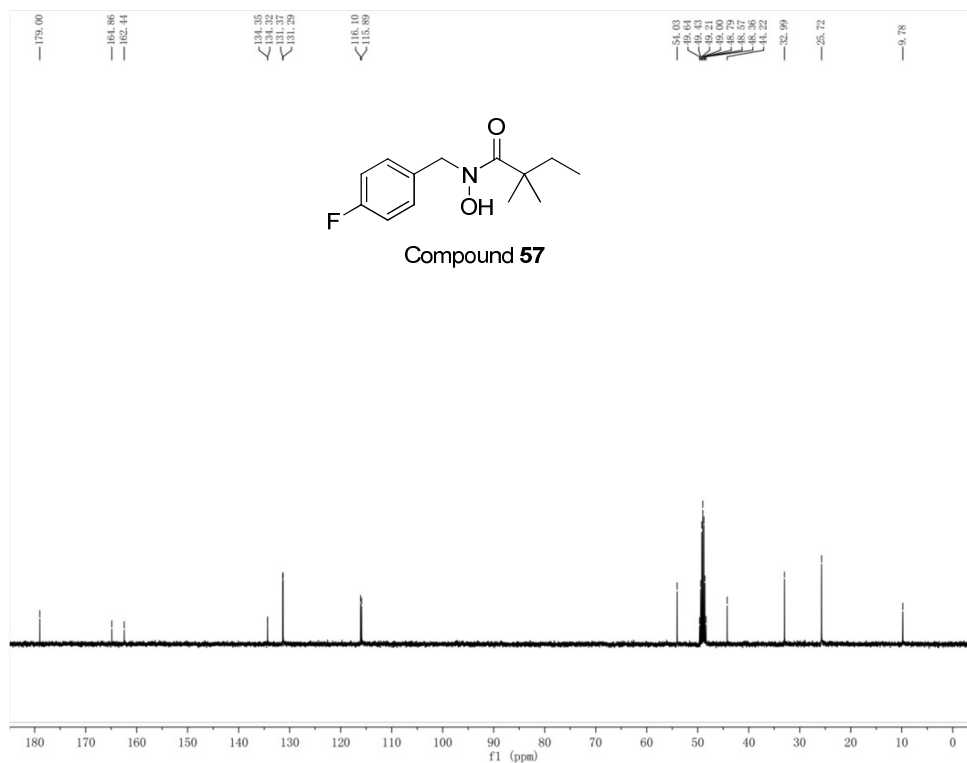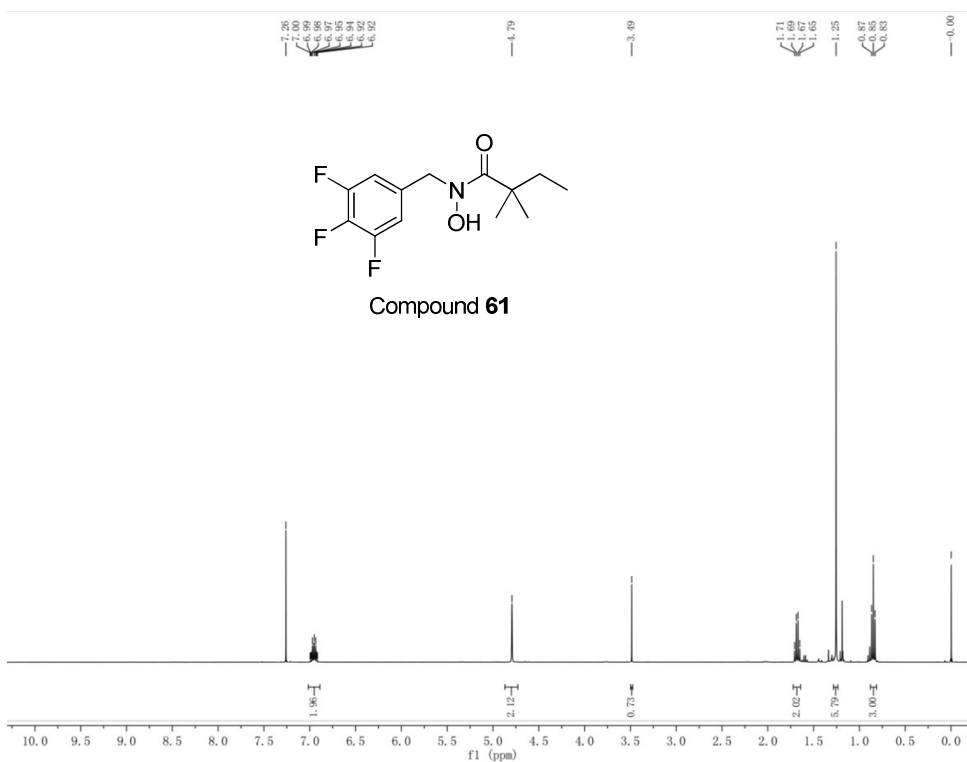

Supplement: Supplementary file 1 [file 7313267]
